# Supplementary material
Source: Springer Nature journal article supplement (https://springermedizin.de/resource/supplementary/12913_2012_2457_MOESM3_ESM.pdf/9531040)

# *Different perspectives*

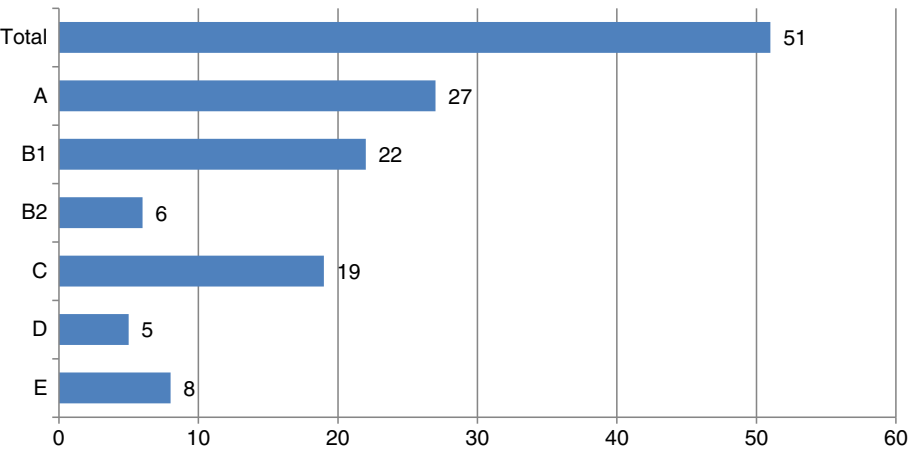

Supplement: MOESM3 [file 9531040]
